# Supplementary material for: Evidence for a Widespread Third System for Bacterial Polysaccharide Export across the Outer Membrane Comprising a Composite OPX/β-Barrel Translocon
Source: PubMed Central journal article supplement (PMC9601211; doi:10.1128/mbio.02032-22), 2022-08-16
Supplement: mbio.02032-22-s0003.pdf [file mbio.02032-22-s0003.pdf]

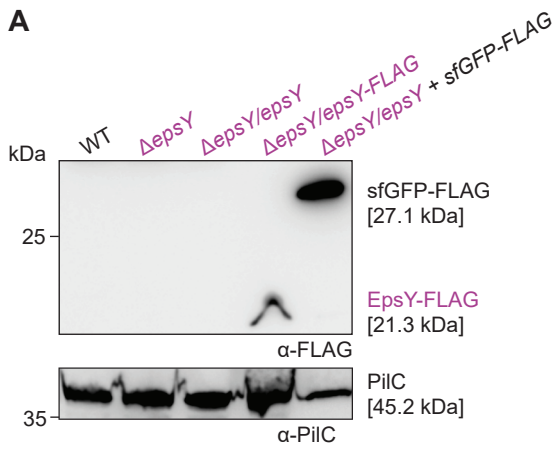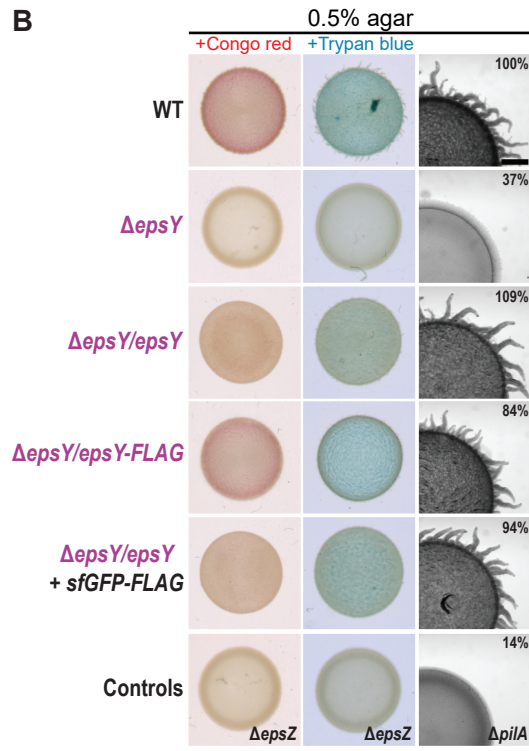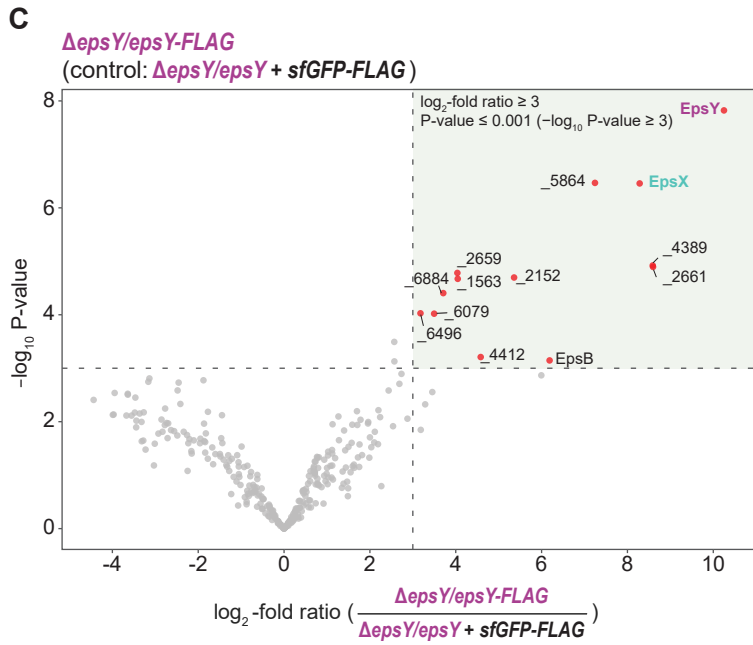

**D**

| Protein name | Function                               | Signal peptide |
|--------------|----------------------------------------|----------------|
| $EpsY$       | OPX protein                            | SPII           |
| MXAN_2661    | 5' nucleotidase                        | SPI            |
| MXAN_4389    | Catalase                               | SPI            |
| $EpsX$       | 18-stranded OM $\beta$ -barrel protein | SPI            |
| MXAN_5864    | Hypothetical protein                   | TAT            |
| $EpsB$       | Glycoside hydrolase                    | No             |
| MXAN_2152    | Oxidoreductase                         | No             |
| MXAN_4412    | Hypothetical protein                   | No             |
| MXAN_1563    | Alkyl hydroperoxide reductase          | No             |
| MXAN_2659    | Hypothetical protein                   | SPI            |
| MXAN_6884    | Hypothetical protein                   | No             |
| MXAN_6079    | Oxidoreductase                         | No             |
| MXAN_6496    | Thiol peroxidase                       | No             |
