# Supplementary material for: Evidence for a Widespread Third System for Bacterial Polysaccharide Export across the Outer Membrane Comprising a Composite OPX/β-Barrel Translocon
Source: PubMed Central journal article supplement (PMC9601211; doi:10.1128/mbio.02032-22), 2022-08-16

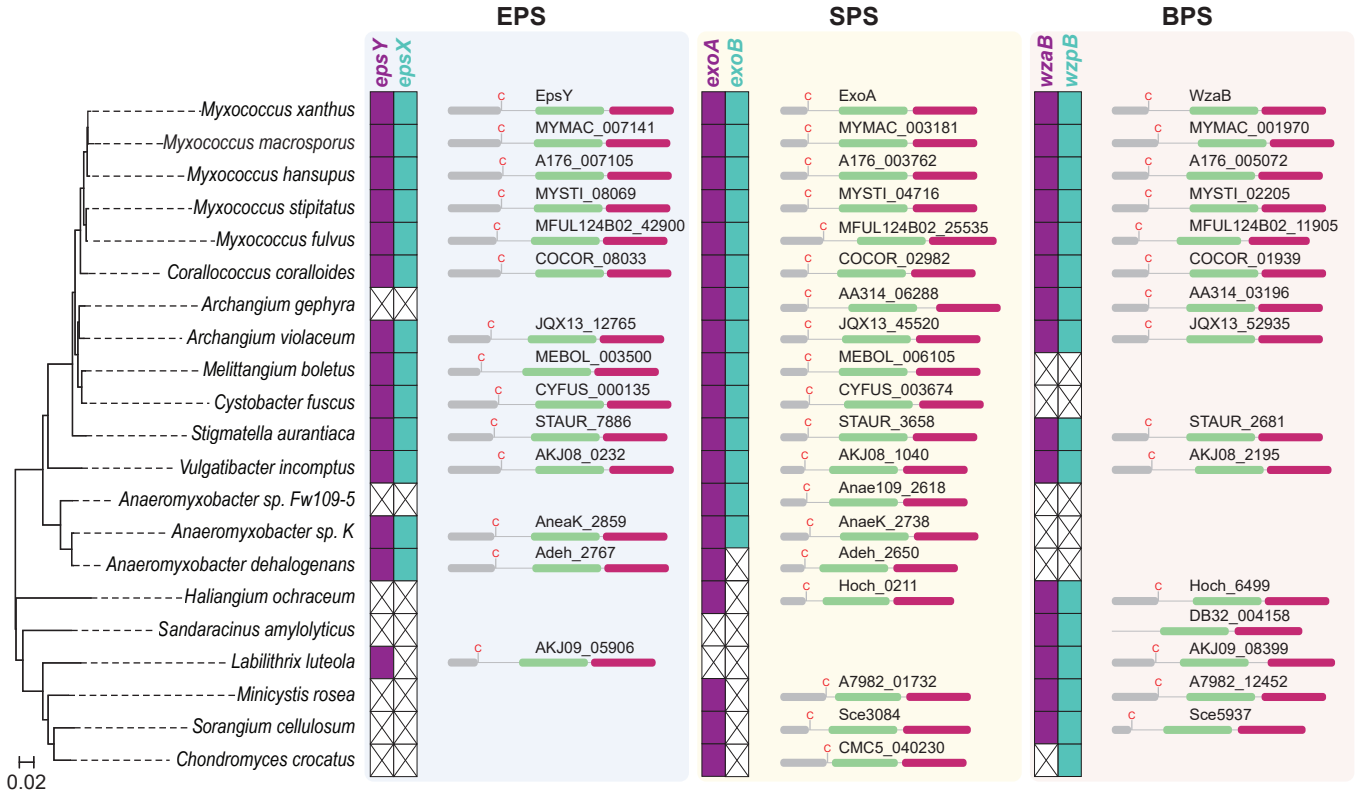

Supplement: mbio.02032-22-s0006.pdf [file mbio.02032-22-s0006.pdf]
